# Supplementary material for: Pneumocystis Colonization in Dogs Is as in Humans
Source: MDPI journal article supplement (doi:10.3390/ijerph19063192), 2022-03-08
Supplement: s1 [file s1]

| N. | ID    | Breed                  | Age (years) | Gender | Cytology BAL                                  | Co-infection | Bb  | My  | CPIV | Bacterial Culture                      | Diagnosis                     |
|----|-------|------------------------|-------------|--------|-----------------------------------------------|--------------|-----|-----|------|----------------------------------------|-------------------------------|
| 23 | 5365  | Affenpinscher          | 4           | M      | Eosinophilic inflammation                     | Pos          | nd  | nd  | nd   | <i>Acinetobacter baumannii</i> complex | Not available                 |
| 24 | 6572  | Afghan Hound           | 5           | F      | Normal                                        | Pos          | Neg | Pos | Neg  | Neg                                    | Interstitial pneumopathy      |
| 25 | 48685 | Akita Inu              | 1           | M      | Normal                                        | Neg          | Neg | Neg | Neg  | Neg                                    | Pyogranulomatous pneumonia    |
| 26 | 6294  | Akita Inu              | 1           | M      | Eosinophilic inflammation                     | nd           | nd  | nd  | nd   | nd                                     | Not available                 |
| 27 | 6059  | Akita Inu              | <1          | M      | Macrophagic and lymphocytic inflammation      | Pos          | Pos | Pos | Neg  | <i>Citrobacter</i> spp.                | Septic pneumonia              |
| 28 | 6714  | American Akita         | 1           | M      | Normal                                        | Pos          | Neg | Neg | Neg  | <i>Enterobacter cloacae</i>            | Lymphoplasmacellular rhinitis |
| 29 | 7405  | American Staffordshire | 5           | F      | Macrophagic and neutrophilic inflammation     | Neg          | Neg | Neg | Neg  | Neg                                    | Pneumopathy                   |
| 30 | 6530  | American Staffordshire | 12          | F      | Lypophagocytosis and macrophagic inflammation | Pos          | Neg | Neg | Neg  | <i>Pseudomonas stutzeri</i>            | Lung carcinoma                |
| 31 | 5607  | American Staffordshire | 1           | F      | Normal                                        | Neg          | Neg | Neg | Neg  | Neg                                    | Systemic Toxoplasmosis        |
| 32 | 6298  | American Staffordshire | 13          | F      | Neutrophilic inflammation                     | nd           | nd  | nd  | nd   | nd                                     | Not available                 |
| 33 | 8503  | Australian Shepherd    | 10          | M      | Macrophagic and neutrophilic inflammation     | Pos          | Neg | Neg | Neg  | <i>Staphylococcus cohnii</i>           | Septic bronchitis             |
| 34 | 7060  | Beagle                 | 6           | M      | Neutrophilic inflammation                     | nd           | nd  | nd  | nd   | nd                                     | Not available                 |
| 35 | 7654  | Beagle                 | 3           | M      | Normal                                        | nd           | nd  | nd  | nd   | nd                                     | Lymphoplasmacellular rhinitis |

|    |       |                  |    |   |                                                      |     |     |     |     |                                                                   |                                    |
|----|-------|------------------|----|---|------------------------------------------------------|-----|-----|-----|-----|-------------------------------------------------------------------|------------------------------------|
| 36 | 5912  | Beagle           | 12 | M | Septic inflammation                                  | Pos | Neg | Neg | Neg | <i>Escherichia coli</i>                                           | Septic pneumonia                   |
| 37 | 53333 | Beagle           | 6  | M | Neutrophilic inflammation                            | nd  | Neg | Neg | Neg | nd                                                                | Not available                      |
| 38 | 8449  | Beagle           | 13 | F | Normal                                               | nd  | nd  | nd  | nd  | nd                                                                | Not available                      |
| 39 | 5679  | Bearded collie   | 13 | F | Septic inflammation                                  | Pos | nd  | nd  | nd  | <i>Citrobacter braakii</i> ;<br><i>Microbacterium paraoxydans</i> | Septic Pneumonia                   |
| 40 | 5757  | Bearded collie   | 13 | F | Neutrophilic inflammation                            | Pos | nd  | nd  | nd  | <i>Acinetobacter baumannii</i> complex                            | Interstitial pneumopathy           |
| 41 | 7944  | Belgian Shepherd | 13 | F | Neutrophilic inflammation                            | Neg | Neg | Neg | Neg | Neg                                                               | Pneumonia                          |
| 42 | 7609  | Bernese          | 2  | M | Normal                                               | nd  | Neg | Neg | Neg | Neg                                                               | Bronchopathy                       |
| 43 | 6442  | Bernese          | 8  | F | Lung sarcoma associated with septic inflammation     | Pos | Neg | Neg | Neg | <i>Klebsiella pneumoniae</i>                                      | Istiocytic sarcoma                 |
| 44 | 7897  | Bernese          | 4  | M | Neutrophilic inflammation                            | Pos | Neg | Neg | nd  | <i>Raoultella planticola</i>                                      | Not available                      |
| 45 | 5557  | Bernese          | 6  | F | Haemorrhage                                          | Pos | Neg | Neg | Neg | <i>Citrobacter braakii</i>                                        | Alveolar interstitial pnueomopathy |
| 46 | 43265 | Bichon Frisé     | 1  | M | not available                                        | Neg | nd  | nd  | nd  | nd                                                                | Not available                      |
| 47 | 5769  | Bolognese        | 8  | M | Neutrophilic inflammation                            | nd  | nd  | nd  | nd  | <i>Pseudomonas aureginosa</i>                                     | Tracheal collapse                  |
| 48 | 5302  | Border collie    | <1 | F | Neutrophilic inflammation with stronglyloides larvae | Pos | Neg | Neg | Neg | <i>Serratia marcescens</i>                                        | Angiostrongylosis                  |
| 49 | 6099  | Border collie    | 4  | M | Macrophagic inflammation                             | Pos | Neg | Neg | Neg | <i>Stenotrophomonas maltophilia</i>                               | Bronchopathy                       |

|    |       |               |    |   |                                                       |     |     |     |     |                                                                         |                                 |
|----|-------|---------------|----|---|-------------------------------------------------------|-----|-----|-----|-----|-------------------------------------------------------------------------|---------------------------------|
| 50 | 6341  | Border collie | 2  | M | Septic inflammation                                   | nd  | nd  | nd  | nd  | nd                                                                      | Not available                   |
| 51 | 8615  | Boxer         | 6  | M | Not diagnostic                                        | Pos | nd  | nd  | nd  | <i>Acinetobacter baumannii</i> ;<br><i>Crhyseobacterium indologenes</i> | Septic pleuritis with pyothorax |
| 52 | 6202  | Boxer         | 1  | F | Septic inflammation                                   | nd  | nd  | nd  | nd  | nd                                                                      | not available                   |
| 53 | 5968  | Boxer         | <1 | F | Suppurative inflammation                              | nd  | nd  | nd  | nd  | nd                                                                      | Not available                   |
| 54 | 6732  | Bullmastiff   | 6  | F | Lymphoma                                              | nd  | nd  | nd  | nd  | nd                                                                      | Not available                   |
| 55 | 6539  | Chihuahua     | 2  | M | Neutrophilic inflammation                             | nd  | nd  | nd  | nd  | nd                                                                      | Pharyngeal stenosis             |
| 56 | 7682  | Chihuahua     | 12 | M | Neutrophilic inflammation                             | nd  | nd  | nd  | nd  | nd                                                                      | Not available                   |
| 57 | 6120  | Chihuahua     | 7  | F | Not diagnostic                                        | Neg | nd  | nd  | nd  | nd                                                                      | Brachycephalic airway syndrome  |
| 58 | 7958  | Chihuahua     | 13 | M | Normal                                                | Pos | Neg | Pos | Neg | <i>Serratia marcescens</i>                                              | Interstitial Pneumopathy        |
| 59 | 7496  | Chihuahua     | 10 | F | Lymphocytic inflammation                              | nd  | nd  | nd  | nd  | nd                                                                      | Not available                   |
| 60 | 8261  | CKCS          | 2  | M | Normal                                                | nd  | nd  | nd  | nd  | nd                                                                      | Not available                   |
| 61 | 7492  | CKCS          | 6  | M | Lymphocytic inflammation                              | Pos | Neg | Neg | Pos | Neg                                                                     | Tracheal and bronchial collapse |
| 62 | 46014 | CKCS          | <1 | M | Neutrophilic inflammation and suspected bordetellosis | nd  | nd  | nd  | nd  | nd                                                                      | Not available                   |
| 63 | 5511  | CKCS          | 6  | F | Normal                                                | nd  | nd  | nd  | nd  | nd                                                                      | Brachycephalic airway syndrome  |

|    |       |                    |    |   |                           |     |     |     |     |                                                                      |                          |
|----|-------|--------------------|----|---|---------------------------|-----|-----|-----|-----|----------------------------------------------------------------------|--------------------------|
| 64 | 60214 | CKCS               | 1  | F | not available             | nd  | nd  | nd  | nd  | nd                                                                   | Not available            |
| 65 | 49804 | CKCS               | 5  | F | Eosinophilic inflammation | Neg | Neg | Neg | Neg | Neg                                                                  | Tracheal collapse        |
| 66 | 40918 | CKCS               | 9  | F | not available             | nd  | nd  | nd  | nd  | nd                                                                   | Not available            |
| 67 | 52124 | CKCS               | <1 | M | nd                        | Pos | Neg | Pos | nd  | Neg                                                                  | Not available            |
| 68 | 7006  | Corso              | 2  | M | Eosinophilic inflammation | Pos | Neg | Neg | Neg | <i>Leclercia adecarboxylata</i>                                      | Not available            |
| 69 | 6909  | Dachshund          | 12 | F | Neutrophilic inflammation | nd  | nd  | nd  | nd  | nd                                                                   | Interstitial pneumopathy |
| 70 | 57302 | Dachshund          | 5  | M | Neutrophilic inflammation | Pos | Neg | Pos | Neg | <i>Staphylococcus hominis</i>                                        | Bacterial pneumonia      |
| 71 | 7484  | Dachshund          | 11 | M | Normal                    | nd  | nd  | nd  | nd  | nd                                                                   | Not available            |
| 72 | 8439  | Dachshund          | 5  | F | Eosinophilic inflammation | Pos | Neg | Neg | Neg | <i>Acinetobacter iwoffii</i>                                         | Bacterial bronchitis     |
| 73 | 51705 | Dachshund          | 9  | F | septic inflammation       | Pos | Neg | Pos | Neg | <i>Neisseria zoodegmatidis</i> ;<br><i>Bergeyella zoohelcum</i>      | Bacterial bronchitis     |
| 74 | 7427  | Dachshund          | 6  | M | Neutrophilic inflammation | Pos | Neg | Pos | Neg | <i>Escherichia coli</i>                                              | Aspiration pneumonia     |
| 75 | 7435  | Dachshund          | 12 | M | Neutrophilic inflammation | Pos | Neg | Pos | Neg | <i>Escherichia coli</i> ,<br><i>staphylococcus pseudointermedius</i> | Bacterial pneumonia      |
| 76 | 50969 | Deutscher Pinscher | 7  | M | nd                        | nd  | nd  | nd  | nd  | nd                                                                   | Not available            |
| 77 | 6258  | Drahthaar          | 11 | M | Septic inflammation       | Pos | Neg | Pos | Neg | <i>Citrobacter werkmanii</i>                                         | Aspiration pneumonia     |

|    |         |                        |    |   |                                                        |     |     |     |     |                              |                                |
|----|---------|------------------------|----|---|--------------------------------------------------------|-----|-----|-----|-----|------------------------------|--------------------------------|
| 78 | 8372    | Drahthaar              | <1 | M | Normal                                                 | Neg | nd  | nd  | nd  | nd                           | Not available                  |
| 79 | 8454    | English Bulldog        | 5  | M | Not diagnostic                                         | nd  | nd  | nd  | nd  | nd                           | Not available                  |
| 80 | 8361    | English Bulldog        | 11 | M | Not diagnostic                                         | nd  | nd  | nd  | nd  | nd                           | Not available                  |
| 81 | 5777    | English Bulldog        | <1 | M | Neutrophilic, lymphocytic and macrophagic inflammation | nd  | nd  | nd  | nd  | <i>Citrobacter werkmanii</i> | Brachycephalic airway syndrome |
| 82 | 6605    | English Cocker Spaniel | 4  | M | Macrophagic and neutrophilic inflammation              | nd  | nd  | nd  | nd  | nd                           | Not available                  |
| 83 | 7215    | English Cocker Spaniel | 13 | M | Neutrophilic inflammation                              | nd  | nd  | nd  | nd  | nd                           | Not available                  |
| 84 | 5526    | English Cocker Spaniel | 9  |   | Not diagnostic                                         | nd  | nd  | nd  | nd  | nd                           | Not available                  |
| 85 | 7394    | English Cocker Spaniel | 11 | M | Macrophagic and neutrophilic inflammation              | Pos | Neg | Pos | Neg | Neg                          | Chronic bronchitis             |
| 86 | 6229    | English setter         | 1  | F | Not diagnostic                                         | nd  | nd  | nd  | nd  | nd                           | Not available                  |
| 87 | 7095    | English setter         | 8  | M | Not diagnostic                                         | nd  | nd  | nd  | nd  | nd                           | Not available                  |
| 88 | 6033    | English setter         | 1  | F | Septic inflammation                                    | Pos | Neg | Neg | Neg | <i>Klebsiella oxytoca</i>    | Bacterial pneumonia            |
| 89 | 6761 sx | English setter         | 6  | M | Eosinophilic inflammation                              | nd  | nd  | nd  | nd  | nd                           | Not available                  |
| 90 | 41590   | Espagneul breton       | 12 | F | nd                                                     | nd  | nd  | nd  | nd  | nd                           | Not available                  |
| 91 | 7424    | Espagneul breton       | 10 | M | Eosinophilic and neutrophilic inflammation             | Neg | Neg | Neg | Neg | Neg                          | Allergic pneumonia             |

|     |       |                 |    |   |                                                                                                      |     |     |     |     |                                                                                                                                           |                                |
|-----|-------|-----------------|----|---|------------------------------------------------------------------------------------------------------|-----|-----|-----|-----|-------------------------------------------------------------------------------------------------------------------------------------------|--------------------------------|
| 92  | 6547  | French bulldog  | 4  | M | Eosinophilic inflammation                                                                            | Pos | Neg | Neg | Neg | <i>Enterobacter cloacae</i>                                                                                                               | Not available                  |
| 93  | 6549  | French bulldog  | 8  | F | Not diagnostic                                                                                       | Pos | Neg | Neg | Neg | <i>Escherichia coli</i>                                                                                                                   | Aspiration pneumonia           |
| 94  | 6169  | French bulldog  | 4  | F | Normal                                                                                               | nd  | nd  | nd  | nd  | nd                                                                                                                                        | Not available                  |
| 95  | 6884  | French bulldog  | 1  | M | Neutrophilic inflammation                                                                            | nd  | nd  | nd  | nd  | nd                                                                                                                                        | Not available                  |
| 96  | 6801  | French bulldog  | 10 | M | Septic inflammation                                                                                  | Pos | Neg | Neg | Neg | <i>Streptococcus canis</i>                                                                                                                | Bacterial pneumonia            |
| 97  | 7136  | French bulldog  | 3  | F | Normal                                                                                               | Pos | Neg | Neg | Neg | <i>Enterobacter cloacae</i>                                                                                                               | Brachycephalic airway syndrome |
| 98  | 5883  | German Sherperd | <1 | F | Not diagnostic                                                                                       | Pos | Neg | Neg | Neg | <i>Acinetobacter baumannii</i> complex                                                                                                    | Bronchopneumonia               |
| 99  | 7221  | German Sherperd | 13 | M | Neutrophilic inflammation                                                                            | Pos | Neg | Neg | Neg | <i>Escherichia coli</i>                                                                                                                   | Aspiration pneumonia           |
| 100 | 7604  | German Sherperd | 5  | F | Neutrophilic and macrophagic inflammation with fungal elements suggestive of <i>Aspergillus</i> spp. | nd  | nd  | nd  | nd  | nd                                                                                                                                        | Pulmonary aspergillosis        |
| 101 | 60375 | German Sherperd | 4  | F | Neutrophilic inflammation                                                                            | Pos | Neg | Neg | Neg | <i>Citrobacter braakii</i> ;<br><i>Staphylococcus saprophyticus</i> ;<br><i>Escherichia fergusonii</i> ;<br><i>Candida guilliermondii</i> | Not available                  |
| 102 | 7310  | German Sherperd | 8  | F | Neutrophilic inflammation                                                                            | nd  | nd  | nd  | nd  | nd                                                                                                                                        | Not available                  |
| 103 | 7340  | German Sherperd | <1 | M | Neutrophilic inflammation                                                                            | nd  | nd  | nd  | nd  | nd                                                                                                                                        | Not available                  |

|     |       |                     |    |   |                                                        |     |     |     |     |                                                    |                                              |
|-----|-------|---------------------|----|---|--------------------------------------------------------|-----|-----|-----|-----|----------------------------------------------------|----------------------------------------------|
| 104 | 6020  | German Sherperd     | 10 | M | Not diagnostic                                         | nd  | nd  | nd  | nd  | nd                                                 | Not available                                |
| 105 | 7185  | Giant Schnauzer     | 10 | M | Normal                                                 | nd  | nd  | nd  | nd  | nd                                                 | Bronchopathy                                 |
| 106 | 5573  | Golden Retreiver    | 1  | M | Neutrophilic Inflammation                              | nd  | nd  | nd  | nd  | nd                                                 | Not available                                |
| 107 | 8573  | Golden Retreiver    | 2  | M | Not diagnostic                                         | nd  | nd  | nd  | nd  | nd                                                 | Not available                                |
| 108 | 60383 | Golden Retreiver    | 8  | M | nd                                                     | nd  | nd  | nd  | nd  | nd                                                 | Not available                                |
| 109 | 7235  | Golden Retreiver    | 2  | M | Septic inflammation                                    | Pos | Neg | Neg | Neg | <i>Klebisella pneumoniae, Enterococcus faecium</i> | Not available                                |
| 110 | 5470  | Great Dane          | 7  | M | Septic inflammation                                    | Pos | Neg | Neg | Neg | <i>Citrobacter werkmanii</i>                       | Bacterial pneumonia                          |
| 111 | 8406  | Greyhound           | 4  | F | Neutrophilic inflammation                              | nd  | nd  | nd  | nd  | nd                                                 | Lung foreign body                            |
| 112 | 7486  | Irish setter        | 7  | M | Neutrophilic inflammation                              | Pos | Neg | Neg | Pos | Neg                                                | Pneumopathy                                  |
| 113 | 7404  | Irish setter        | 13 | M | Macrophagic and neutrophilic inflammation              | Pos | nd  | nd  | nd  | <i>Pseudomonas aeruginosa</i>                      | Bacterial bronchitis and laryngeal paralysis |
| 114 | 7106  | Jack Russel Terrier | 6  | F | Neutrophilic, macrophagic and lymphocytic inflammation | nd  | nd  | nd  | nd  | nd                                                 | Not available                                |
| 115 | 55515 | Jack Russel Terrier | 2  | F | Macrophagic and neutrophilic inflammation              | Pos | Pos | Neg | Neg | Neg                                                | Bacterial pneumonia                          |
| 116 | 7597  | Jack Russel Terrier | 10 | F | Normal                                                 | Pos | Pos | Neg | Neg | Neg                                                | Bacterial pneumonia                          |

|     |       |                     |    |   |                                           |     |     |     |     |                                         |                                                  |
|-----|-------|---------------------|----|---|-------------------------------------------|-----|-----|-----|-----|-----------------------------------------|--------------------------------------------------|
| 117 | 52547 | Jack Russel Terrier | 6  | F | septic inflammation                       | Pos | Pos | Neg | Neg | <i>Pseudomonas aeruginosa</i>           | Bacterial pneumonia                              |
| 118 | 6168  | Jack Russel Terrier | 6  | M | Normal                                    | nd  | nd  | nd  | nd  | nd                                      | Not available                                    |
| 119 | 7468  | Jack Russel Terrier | 2  | M | Neutrophilic inflammation                 | nd  | nd  | nd  | nd  | nd                                      | Not available                                    |
| 120 | 8317  | Japan Chin          | 10 | F | Neutrophilic inflammation                 | Pos | Neg | Neg | Neg | <i>Staphylococcus pseudointermedius</i> | Chronich bronchitis and interstitial pneumopathy |
| 121 | 7125  | Kooikerhondje       | 8  | F | Neutrophilic and lymphocytic inflammation | Pos | Neg | Neg | Neg | <i>Enterobacter cloacae</i>             | Interstitial pneumopathy                         |
| 122 | 5789  | Kurzhaar            | 9  | M | Neutrophilic-eosinophilic inflammation    | Pos | Neg | Neg | Neg | <i>Citrobacter werkmanii</i>            | Laryngeal paralysis                              |
| 123 | 5991  | Kurzhaar            | 2  | M | Neutrophilic inflammation                 | nd  | nd  | nd  | nd  | nd                                      | Not available                                    |
| 124 | 6869  | Labrador Retreiver  | 13 | M | Neutrophilic inflammation                 | Pos | Neg | Pos | Neg | Mycoplasma spp.                         | Chronic bronchitis and bronchomalacia            |
| 125 | 6384  | Labrador Retreiver  | 2  | M | Macrophagic and neutrophilic inflammation | nd  | nd  | nd  | nd  | nd                                      | Not available                                    |
| 126 | 5684  | Labrador Retreiver  | 8  | F | Neutrophilic Inflammation                 | Pos | Neg | Neg | nd  | <i>Citrobacter braakii</i>              | Not available                                    |
| 127 | 8337  | Labrador Retreiver  | 10 | F | Strongylus larvae                         | Pos | Neg | Pos | Neg | Neg                                     | Angiostrongylosis                                |
| 128 | 5457  | Labrador Retreiver  | 13 | F | Suppurative inflammation                  | Pos | Pos | Pos | Neg | Neg                                     | Bacterial pneumonia                              |
| 129 | 5768  | Labrador Retreiver  | <1 | F | Septic inflammation                       | Pos | Neg | Pos | Neg | <i>Pseudomonas stutzeri</i>             | Bacterial pneumonia                              |
| 130 | 7212  | Labrador Retreiver  | 8  | M | Neutrophilic inflammation                 | nd  | nd  | nd  | nd  | nd                                      | Not available                                    |



|     |       |                    |    |   |                                                         |     |     |     |     |                                                                   |                                 |
|-----|-------|--------------------|----|---|---------------------------------------------------------|-----|-----|-----|-----|-------------------------------------------------------------------|---------------------------------|
| 131 | 7240  | Labrador Retriever | 10 | M | Lymphocytic inflammation                                | nd  | nd  | nd  | nd  | nd                                                                | Not available                   |
| 132 | 6632  | Labrador Retriever | 10 | M | Neutrophilic, macrophagic and eosinophilic inflammation | nd  | nd  | nd  | nd  | nd                                                                | Not available                   |
| 133 | 5331  | Labrador Retriever | 10 | M | Macrophagic and neutrophilic inflammation               | Pos | Neg | Neg | Neg | <i>Stenotrophomonas maltophilia</i>                               | Not available                   |
| 134 | 7797  | Labrador Retriever | 12 | M | Neutrophilic inflammation                               | Pos | Neg | Neg | Neg | <i>Pseudomona putida</i> ;<br><i>Chryseobacterium indologenes</i> | Bacterial bronchitis            |
| 135 | 5973  | Labrador Retriever | 13 | F | Neutrophilic inflammation                               | nd  | nd  | nd  | nd  | nd                                                                | Not available                   |
| 136 | 8334  | Labrador Retriever | 10 | F | Neutrophilic inflammation                               | nd  | nd  | nd  | nd  | nd                                                                | Not available                   |
| 137 | 43250 | Leonberger         | 8  | M | Macrophagic and neutrophilic inflammation               | Neg | Neg | Neg | Neg | <i>Enterobacter cloacae</i>                                       | Lung tumor                      |
| 138 | 7731  | Maltese            | 6  | M | Neutrophilic inflammation                               | nd  | nd  | nd  | nd  | nd                                                                | Not available                   |
| 139 | 6771  | Maltese            | 6  | M | Normal                                                  | nd  | nd  | nd  | nd  | nd                                                                | Not available                   |
| 140 | 6308  | Maltese            | 10 | F | Neutrophilic inflammation                               | nd  | nd  | nd  | nd  | nd                                                                | Not available                   |
| 141 | 7671  | Maremma sheepdog   | 8  | M | Macrophagic and neutrophilic inflammation               | nd  | nd  | nd  | nd  | nd                                                                | Not available                   |
| 142 | 6964  | Mongrel            | 8  | F | Septic inflammation                                     | Pos | Neg | Neg | Neg | <i>Escherichia coli</i>                                           | Not available                   |
| 143 | 6531  | Mongrel            | 2  | M | Not diagnostic                                          | Pos | Neg | Pos | Neg | Neg                                                               | Uppur respiratory tract disease |

|     |       |         |    |   |                                           |     |     |     |     |                                        |                                                 |
|-----|-------|---------|----|---|-------------------------------------------|-----|-----|-----|-----|----------------------------------------|-------------------------------------------------|
| 144 | 6689  | Mongrel | 2  | F | septic inflammation                       | Pos | Neg | Neg | Neg | <i>Enterobacter cloacae</i>            | Bacterial pneumonia                             |
| 145 | 7035  | mongrel | 8  | F | Eosinophilic inflammation                 | Neg | Neg | Neg | Neg | Neg                                    | Eosinophilic broncopneumonia                    |
| 146 | 6303  | Mongrel | 13 | M | Normal                                    | nd  | nd  | nd  | nd  | nd                                     | Chronic bronchitis                              |
| 147 | 5969  | Mongrel | 8  | F | Neutrophilic inflammation                 | Pos | Neg | Neg | Neg | <i>Stenotrophomonas maltophilia</i>    | Aspiration pneumonia                            |
| 148 | 51911 | Mongrel | 7  | F | nd                                        | nd  | nd  | nd  | nd  | nd                                     | Not available                                   |
| 149 | 8371  | Mongrel | 14 | F | septic inflammation                       | Pos | Neg | Neg | Neg | <i>Escherichia coli</i>                | Not available                                   |
| 150 | 6315  | Mongrel | 12 | F | Macrophagic and neutrophilic inflammation | Pos | Neg | Neg | Neg | <i>Pseudomonas stutzeri</i>            | Bacterial pneumonia                             |
| 151 | 5760  | Mongrel | 12 | M | Neutrophilic inflammation                 | Neg | Neg | Neg | Neg | Neg                                    | Lung lobe torsion plus interstitial pneumopathy |
| 152 | 5980  | Mongrel | 4  | F | Normal                                    | nd  | nd  | nd  | nd  | nd                                     | Not available                                   |
| 153 | 6113  | Mongrel | 13 | F | Neutrophilic inflammation and haemorrhage | Pos | Neg | Neg | Neg | <i>Acinetobacter baumannii</i> complex | Bacterial pneumonia                             |
| 154 | 5626  | Mongrel | 12 | M | Neutrophilic Inflammation                 | nd  | nd  | nd  | nd  | nd                                     | Chronic bronchitis                              |
| 155 | 7325  | Mongrel | 13 | M | Neutrophilic inflammation                 | Pos | Neg | Neg | Neg | <i>Acinetobacter baumannii</i> complex | Broncopneumopathy                               |
| 156 | 6121  | Mongrel | 10 | F | Macrophagic and neutrophilic inflammation | nd  | nd  | nd  | nd  | nd                                     | Not available                                   |
| 157 | 6706  | Mongrel | 3  | M | Neutrophilic inflammation                 | Pos | Neg | Neg | Neg | <i>Enterobacter cloacae</i>            | Pneumonia                                       |

|     |       |         |    |   |                                                                      |     |     |     |     |                                     |                                        |
|-----|-------|---------|----|---|----------------------------------------------------------------------|-----|-----|-----|-----|-------------------------------------|----------------------------------------|
| 158 | 6134  | Mongrel | 13 | M | Neoplasia                                                            | Neg | Neg | Neg | Neg | <i>Pseudomonas stutzeri</i>         | Lung carcinoma                         |
| 159 | 8327  | mongrel | 1  | F | Eosinophilic, lymphocytic, macrophagic and neutrophilic inflammation | nd  | nd  | nd  | nd  | nd                                  | Not available                          |
| 160 | 57917 | Mongrel | 11 | F | Macrophagic inflammation                                             | Pos | Neg | Neg | Neg | <i>Stenotrophomonas maltophilia</i> | Not available                          |
| 161 | 6190  | Mongrel | 4  | M | septic inflammation                                                  | Pos | Neg | Neg | Neg | Acinetobacter spp.                  | Bacterial pneumonia                    |
| 162 | 6642  | Mongrel | 8  | M | Erythrophagocytosis                                                  | nd  | nd  | nd  | nd  | neg                                 | Suspected lung neoplasia               |
| 163 | 6488  | Mongrel | 8  | F | Neutrophilic inflammation                                            | Pos | Neg | Pos | Neg | Acinetobacter baumannii complex     | Chronic bronchitis                     |
| 164 | 5584  | Mongrel | 15 | M | Eosinophilic, macrophagic and neutrophilic inflammation              | Pos | Neg | Neg | Neg | <i>Citrobacter braakii</i>          | Chronic bronchitis                     |
| 165 | 5900  | Mongrel | 5  | F | Eosinophilic inflammation                                            | Pos | Neg | pos | Neg | Mycoplasma spp.                     | Canine mycoplasmosis                   |
| 166 | 41007 | Mongrel | 4  | F | Eosinophilic inflammation                                            | Pos | Neg | Neg | Neg | <i>Stenotrophomonas maltophilia</i> | Eosinophilic bronchitis                |
| 167 | 7253  | Mongrel | 2  | M | Macrophagic and neutrophilic inflammation                            | Neg | Neg | Neg | Neg | Neg                                 | Sterile panniculitis and lymphadenitis |
| 168 | 5687  | Mongrel | 8  | F | Eosinophilic inflammation                                            | nd  | nd  | nd  | nd  | nd                                  | Not available                          |
| 169 | 8003  | Mongrel | 12 | M | Normal                                                               | nd  | nd  | nd  | nd  | nd                                  | Not available                          |
| 170 | 7332  | Mongrel | 13 | M | Normal                                                               | nd  | nd  | nd  | nd  | nd                                  | Laryngeal paralysis                    |

|     |        |         |    |   |                                                        |     |     |     |     |                                                                      |                           |
|-----|--------|---------|----|---|--------------------------------------------------------|-----|-----|-----|-----|----------------------------------------------------------------------|---------------------------|
| 171 | 5591   | Mongrel | 13 | M | Macrophagic inflammation                               | Pos | Neg | Neg | Neg | <i>Stenotrophomonas maltophilia</i>                                  | Not available             |
| 172 | 7472   | Mongrel | 11 | F | Macrophagic and neutrophilic inflammation              | nd  | nd  | nd  | nd  | nd                                                                   | Not available             |
| 173 | 5974   | Mongrel | 10 | F | Carcinoma                                              | Pos | Neg | Neg | Neg | <i>Citrobacter freundii</i> ;<br><i>Stenotrophomonas maltophilia</i> | Lung carcinoma            |
| 174 | 8257   | Mongrel | 15 | F | Normal                                                 | Pos | Neg | Pos | Neg | Neg                                                                  | Chronic bronchitis        |
| 175 | 5436   | Mongrel | 15 | M | Lymphocytic and macrophagic inflammation               | Pos | Neg | Pos | Neg | Neg                                                                  | Mycoplasmosis             |
| 176 | 5746 A | Mongrel | 14 | M | Neutrophilic inflammation and haemorrhage              | nd  | nd  | nd  | nd  | nd                                                                   | Not available             |
| 177 | 5882   | Mongrel | 10 | F | Septic inflammation                                    | Pos | Neg | Pos | Neg | <i>Acinetobacter baumannii</i> complex                               | Aspiration pneumonia      |
| 178 | 6609   | Mongrel | 13 | F | Neutrophilic inflammation                              | nd  | nd  | nd  | nd  | nd                                                                   | Not available             |
| 179 | 7258   | Mongrel | 14 | F | Normal                                                 | nd  | nd  | nd  | nd  | nd                                                                   | Not available             |
| 180 | 5332   | Mongrel | 13 | F | nd                                                     | nd  | nd  | nd  | nd  | nd                                                                   | Not available             |
| 181 | 7832   | Mongrel | 10 | F | Lymphocytic, macrophagic and neutrophilic inflammation | Pos | Neg | Pos | Neg | <i>Pseudomonas putida</i> ;<br><i>Streptococcus canis</i>            | Bacterial broncopneumonia |
| 182 | 5731 A | Mongrel | 5  | M | Eosinophilic and macrophagic inflammation              | nd  | nd  | nd  | nd  | nd                                                                   | Not available             |
| 183 | 6271   | Mongrel | 5  | M | Septic inflammation                                    | nd  | nd  | nd  | nd  | nd                                                                   | Not available             |

|     |      |         |    |   |                           |     |     |     |     |                                     |                                               |
|-----|------|---------|----|---|---------------------------|-----|-----|-----|-----|-------------------------------------|-----------------------------------------------|
| 184 | 6284 | Mongrel | 5  | M | Not diagnostic            | Pos | Neg | Neg | Neg | <i>Stenotrophomonas maltophilia</i> | Interstitial pneumopathy                      |
| 185 | 5333 | Mongrel | 10 | F | Normal                    | nd  | nd  | nd  | nd  | nd                                  | not available                                 |
| 186 | 6361 | mongrel | 12 | M | nd                        | nd  | nd  | nd  | nd  | nd                                  | Not available                                 |
| 187 | 6797 | Mongrel | 1  | F | Septic inflammation       | Pos | Pos | neg | neg | <i>Acinetobacter iwoffii</i>        | Bacterial pneumonia                           |
| 188 | 7761 | Mongrel | 13 | M | Normal                    | Pos | Neg | Neg | Neg | <i>Staphylococcus hominis</i>       | Tracheal and bronchial collapse               |
| 189 | 5791 | Mongrel | 8  | M | Eosinophilic inflammation | nd  | nd  | nd  | nd  | nd                                  | Not available                                 |
| 190 | 8370 | Mongrel | 13 | M | NOrmal                    | Pos | Neg | Pos | Neg | Neg                                 | Broncomalacia                                 |
| 191 | 8038 | Mongrel | 5  | F | Normal                    | nd  | nd  | nd  | nd  | nd                                  | Not available                                 |
| 192 | 8227 | Mongrel | 11 | M | Normal                    | nd  | nd  | nd  | nd  | nd                                  | Not available                                 |
| 193 | 8418 | Mongrel | 8  | F | Normal                    | nd  | nd  | nd  | nd  | nd                                  | Not available                                 |
| 194 | 7755 | Mongrel | 12 | M | Normal                    | nd  | nd  | nd  | nd  | nd                                  | Not available                                 |
| 195 | 7738 | Mongrel | 7  | F | Macrophagic inflammation  | Pos | Neg | Neg | Neg | <i>Klebsiella pneumoniae</i>        | Not available                                 |
| 196 | 6603 | Mongrel | 11 | F | Neutrophilic inflammation | Pos | Neg | Pos | Neg | <i>Enterobacter cloacae</i>         | Bronchial collapse                            |
| 197 | 8284 | Mongrel | 13 | M | Normal                    | Nd  | nd  | nd  | nd  | nd                                  | Interstitial pneumopathy                      |
| 198 | 8191 | Mongrel | 14 | M | Neutrophilic inflammation | nd  | nd  | nd  | nd  | nd                                  | Lymphoplasmacellular rhinitis and pneumopathy |

|     |      |           |    |   |                                            |     |     |     |     |                                        |                             |
|-----|------|-----------|----|---|--------------------------------------------|-----|-----|-----|-----|----------------------------------------|-----------------------------|
| 199 | 7978 | Mongrel   | 14 | F | Neutrophilic and eosinophilic inflammation | nd  | nd  | nd  | nd  | nd                                     | Not available               |
| 200 | 7252 | Mongrel   | 9  | M | Normal                                     | nd  | nd  | nd  | nd  | nd                                     | Not available               |
| 201 | 8558 | Mongrel   | 4  | M | Normal                                     | nd  | nd  | nd  | nd  | nd                                     | Septic pleuritis            |
| 202 | 8593 | Mongrel   | <1 | F | septic inflammation                        | nd  | nd  | nd  | nd  | <i>Enterobacter hormaechei</i>         | not available               |
| 203 | 5907 | Mongrel   | 9  | F | Macrophagic and neutrophilic inflammation  | nd  | nd  | nd  | nd  | nd                                     | Not available               |
| 204 | 5496 | Mongrel   | 11 | F | Eosinophilic inflammation                  | nd  | nd  | nd  | nd  | nd                                     | Not available               |
| 205 | 6111 | Mongrel   | 16 | F | Carcinoma                                  | nd  | nd  | nd  | nd  | nd                                     | Lung carcinoma              |
| 206 | 8596 | Mongrel   | 10 | M | Neutrophilic inflammation                  | nd  | nd  | nd  | nd  | nd                                     | Not available               |
| 207 | 8392 | Mongrel   | 9  | M | Neutrophilic inflammation                  | nd  | nd  | nd  | nd  | nd                                     | Not available               |
| 208 | 6317 | Mongrel   | 5  | M | Neutrophilic inflammation                  | Neg | Neg | Neg | Neg | <i>Acinetobacter baumannii complex</i> | Tracheal collapse           |
| 209 | 5370 | Mongrel   | 13 | M | Eosinophilic inflammation                  | nd  | nd  | nd  | nd  | nd                                     | Not available               |
| 210 | 5369 | Mongrel   | 8  | F | Macrophagic and neutrophilic inflammation  | nd  | nd  | nd  | nd  | nd                                     | Not available               |
| 211 | 6087 | Pitt-bull | 12 | F | Macrophagic and neutrophilic inflammation  | nd  | nd  | nd  | nd  | nd                                     | Bronchopathy/bronchiectasia |
| 212 | 5478 | Pitt-bull | 7  | F | Not diagnostic                             | nd  | nd  | nd  | nd  | nd                                     | Not available               |

|     |       |                |    |   |                                           |     |     |     |     |                                                                            |                           |
|-----|-------|----------------|----|---|-------------------------------------------|-----|-----|-----|-----|----------------------------------------------------------------------------|---------------------------|
| 213 | 6710  | Pitt-bull      | 7  | M | Lymphoma                                  | nd  | nd  | nd  | nd  | nd                                                                         | Not available             |
| 214 | 6941  | Pomeranian dog | 10 | F | Neutrophilic inflammation                 | nd  | nd  | nd  | nd  | nd                                                                         | Not available             |
| 215 | 7684  | Pomeranian dog | 3  | M | Normal                                    | Pos | Neg | Neg | Neg | <i>Pseudomonas aeruginosa</i> ;<br><i>Staphylococcus pseudointermedius</i> | Bacterial pneumonia       |
| 216 | 5325  | Pomeranian dog | 1  | M | Normal                                    | nd  | nd  | nd  | nd  | nd                                                                         | Not available             |
| 217 | 52758 | Pomeranian dog | 7  | M | Normal                                    | Pos | Neg | Neg | Neg | <i>Streptococcus agalactiae</i>                                            | Tracheal collapse         |
| 218 | 5977  | Pomeranian dog | 11 | F | Macrophagic and neutrophilic inflammation | nd  | nd  | nd  | nd  | nd                                                                         | Not available             |
| 219 | 7301  | Pomeranian dog | 11 | M | Neutrophilic inflammation                 | nd  | nd  | nd  | nd  | nd                                                                         | Not available             |
| 220 | 7322  | Pug            | 7  | M | Normal                                    | nd  | nd  | nd  | nd  | nd                                                                         | Not available             |
| 221 | 8362  | Pug            | 10 | M | Normal                                    | nd  | nd  | nd  | nd  | nd                                                                         | Not available             |
| 222 | 8073  | Rottweiler     | 12 | M | Not diagnostic                            | Pos | Neg | Pos | Neg | <i>Pseudomonas aeruginosa</i>                                              | Bacterial broncopneumonia |
| 223 | 7128  | Rottweiler     | 8  | M | Neutrophilic inflammation                 | Pos | nd  | nd  | nd  | <i>Klebsiella pneumoniae</i> ;<br><i>Staphylococcus pseudointermedius</i>  | Aspiration pneumonia      |
| 224 | 8404  | Samoiedo       | 10 | F | Macrophagic inflammation                  | nd  | nd  | nd  | nd  | Neg                                                                        | Tracheal collapse         |
| 225 | 5927  | Schnauzer      | 12 | M | Macrophagic and neutrophilic inflammation | Pos | Neg | Neg | Neg | <i>Citrobacter</i> spp.                                                    | Bronchopathy              |

|     |        |                   |    |   |                                            |     |     |     |     |                                   |                                      |
|-----|--------|-------------------|----|---|--------------------------------------------|-----|-----|-----|-----|-----------------------------------|--------------------------------------|
| 226 | 7318   | Segugio austriaco | <1 | F | Neutrophilic inflammation                  | Pos | Neg | Neg | Neg | <i>Bordetella bronchiseptica</i>  | Bacterial pneumonia                  |
| 227 | 6220   | Segugio Italiano  | 1  | M | Eosinophilic inflammation                  | Neg | Neg | Neg | Neg | Neg                               | Eosinophilic pneumonia               |
| 228 | 5930   | Segugio Italiano  | 13 | M | Macrophagic and neutrophilic inflammation  | Pos | Neg | Neg | Neg | <i>Citrobacter</i> spp.           | Not available                        |
| 229 | 5766 A | Setter Gordon     | 5  | M | Eosinophilic inflammation                  | nd  | nd  | nd  | nd  | nd                                | Not available                        |
| 230 | 51586  | shiba-inu         | 4  | F | Eosinophilic inflammation                  | nd  | nd  | nd  | nd  | nd                                | Eosinophilic pneumonia               |
| 231 | 5966   | Shih-tzu          | 13 | M | Eosinophilic inflammation                  | nd  | nd  | nd  | nd  | nd                                | Not available                        |
| 232 | 51363  | Shih-tzu          | 13 | F | Normal                                     | Pos | Neg | Neg | Neg | Neg                               | Chronic bronchopathy                 |
| 233 | 5553   | Shih-tzu          | 9  | F | Neutrophilic inflammation                  | Pos | nd  | nd  | nd  | <i>Citrobacter freundii</i>       | Brachycephalic airway syndrome       |
| 234 | 7487   | Tibetan mastin    | 10 | M | Macrophagic inflammation                   | Pos | Neg | Neg | Pos | <i>Enterobacter cancerogenous</i> | Bronchitis                           |
| 235 | 6550   | Toy poddle        | 15 | F | Neutrophilic inflammation                  | Pos | neg | neg | Pos | <i>Streptococcus canis</i>        | Pnuemonia                            |
| 236 | 6016   | Toy poddle        | 13 | F | Lymphocytic and macrophagic inflammation   | Pos | Neg | Neg | Neg | <i>Citrobacter freundii</i>       | Tracheal collapse and bronchomalacia |
| 237 | 8398   | Vizla             | 2  | M | Eosinophilic and neutrophilic inflammation | Pos | Neg | Neg | Neg | <i>Escherichia coli</i>           | Bacterial pneumonia                  |
| 238 | 7943   | Weimaraner        | 13 | F | Eosinophilic inflammation                  | Pos | Neg | Neg | Neg | <i>Serratia marcescens</i>        | Not available                        |
| 239 | 7292   | Weimaraner        | 1  | M | Normal                                     | Neg | Neg | Neg | Neg | Neg                               | Bronchopneumonia                     |



|     |       |                             |    |   |                                                                     |     |     |     |     |                                     |                          |
|-----|-------|-----------------------------|----|---|---------------------------------------------------------------------|-----|-----|-----|-----|-------------------------------------|--------------------------|
| 240 | 8459  | Weimaraner                  | 1  | M | Macrophagic and neutrophilic inflammation with larvae of strongylus | Neg | Neg | Neg | nd  | Neg                                 | Angiostrongylosis        |
| 241 | 7403  | Weimaraner                  | 8  | F | Macrophagic and neutrophilic inflammation                           | nd  | nd  | nd  | nd  | nd                                  | Pneumopathy              |
| 242 | 42668 | West Highland White terrier | 11 | M | nd                                                                  | nd  | nd  | nd  | nd  | nd                                  | Not available            |
| 243 | 7183  | West Highland White terrier | 10 | F | Septic inflammation                                                 | Pos | nd  | nd  | nd  | nd                                  | Rhinitis and pneumopathy |
| 244 | 52659 | West Highland White terrier | 13 | M | Macrophagic and neutrophilic inflammation                           | nd  | nd  | nd  | nd  | nd                                  | Interstitial pneumopathy |
| 245 | 5616  | Yorkshire Terrier           | 6  | F | Normal                                                              | nd  | nd  | nd  | nd  | nd                                  | Not available            |
| 246 | 7639  | Yorkshire Terrier           | 14 | F | Neutrophilic inflammation                                           | nd  | nd  | nd  | nd  | nd                                  | Not available            |
| 247 | 6928  | Yorkshire Terrier           | 8  | F | Normal                                                              | Pos | Neg | Neg | Neg | Klebsiella pneumoniae               | Tracheal collapse        |
| 248 | 6342  | Yorkshire Terrier           | 14 | M | Septic inflammation                                                 | Pos | Neg | Neg | Neg | <i>Stenotrophomonas maltophilia</i> | Pneumonia                |
| 249 | 5318  | Yorkshire Terrier           | 9  | M | Normal                                                              | Pos | Neg | Neg | Neg | <i>Serratia marcescens</i>          | Tracheal collapse        |
| 250 | 8095  | Yorkshire Terrier           | 11 | M | Normal                                                              | Neg | Neg | Neg | Neg | Neg                                 | Chronic bronchopathy     |
| 251 | 6912  | Zwergpinscher               | 12 | M | Not diagnostic                                                      | Pos | Neg | Neg | Neg | <i>Stenotrophomonas maltophilia</i> | Interstitial pneumopathy |
| 252 | 6881  | Zwergpinscher               | 10 | F | Macrophagic and neutrophilic inflammation                           | Pos | Pos | Neg | Neg | <i>Klebsiella pneumoniae</i>        | Bacterial pneumonia      |
| 253 | 8148  | Zwergpinscher               | 13 | F | Neutrophilic inflammation                                           | Pos | Neg | Neg | Neg | <i>Serratia marcescens</i>          | Interstitial pneumopathy |

|     |      |               |    |   |                     |     |     |     |     |                                                                             |                                 |
|-----|------|---------------|----|---|---------------------|-----|-----|-----|-----|-----------------------------------------------------------------------------|---------------------------------|
| 254 | 7630 | Zwergpinscher | 8  | M | Normal              | Neg | Neg | Neg | Neg | Neg                                                                         | Bronchial and tracheal collapse |
| 255 | 5524 | Zwergpinscher | 10 | F | Septic inflammation | Pos | Neg | Neg | Neg | <i>Citrobacter braakii</i> ;<br><i>Microbacterium</i><br><i>paraoxydans</i> | Septic Bronchitis               |

Table S1: Details of PCP negative dogs (from 23 to 255) including breed, gender, age, clinical signs, radiographic and laboratory findings, treatment, and outcome when available.

Bp = *Bordetella bronchiseptica*

My= mycoplasma

CPIV = Canine parainfluenza virus

nd= not done
